# Supplementary material
Source: HighWire-hosted journal article supplement (https://qualitysafety.bmj.com/highwire/filestream/161449/field_highwire_adjunct_files/3/bmjqs-2021-014529supp004_data_supplement.pdf)
Supplement: bmjqs-2021-014529supp004_data_supplement.pdf [file bmjqs-2021-014529supp004_data_supplement.pdf]

## Appendix 4: Medline search strategy

| # ▲ | Searches                                                                                                                                                                                                                       |
|-----|--------------------------------------------------------------------------------------------------------------------------------------------------------------------------------------------------------------------------------|
| 1   | safety netting.mp.                                                                                                                                                                                                             |
| 2   | safety net*.ti,ab.                                                                                                                                                                                                             |
| 3   | ((talk* or communicat* or explain* or decision making) adj5 (uncertain* or risk* or concern*)) and (re-consult* or reconsult* or re-assess* or reassess* or plan* or referral* or escalat*).ti,ab.                             |
| 4   | ((talk* or communicat* or explain* or decision making) adj5 (uncertain* or risk* or concern*)) and ((follow up or future or further or additional or extra or seek*) adj5 (appointment* or consult* or help or advice)).ti,ab. |
| 5   | ((talk* or communicat* or explain* or decision making) adj5 (uncertain* or risk* or concern*)) and patient safety).ti,ab.                                                                                                      |
| 6   | ((talk* or communicat* or explain* or decision making) adj5 (uncertain* or risk* or concern*)) and (information adj3 need*).ti,ab.                                                                                             |
| 7   | ((diagnos* adj3 uncertain*) and (re-consult* or reconsult* or re-assess* or reassess* or plan* or referral* or escalat* or return*).ti,ab.                                                                                     |
| 8   | ((diagnos* adj3 uncertain*) and ((follow up or future or further or additional or extra or seek*) adj5 (appointment* or consult* or help or advice)).ti,ab.                                                                    |
| 9   | ((diagnos* adj3 uncertain*) and patient safety).ti,ab.                                                                                                                                                                         |
| 10  | ((diagnos adj3 uncertain*) and (information adj3 need*).ti,ab.                                                                                                                                                                 |
| 11  | (red flag* and (re-consult* or reconsult* or re-assess* or reassess* or plan* or referral* or escalat* or return*).ti,ab.                                                                                                      |
| 12  | (red flag* and ((follow up or future or further or additional or extra or seek*) adj5 (appointment* or consult* or help or advice)).ti,ab.                                                                                     |
| 13  | (red flag* and patient safety).ti,ab.                                                                                                                                                                                          |
| 14  | (red flag* and (information adj3 need*).ti,ab.                                                                                                                                                                                 |
| 15  | ((worr* or concern*) adj3 (symptom* or sign* or feature*)) and (re-consult* or reconsult* or re-assess* or reassess* or plan* or referral* or escalat* or return*).ti,ab.                                                      |
| 16  | ((worr* or concern*) adj3 (symptom* or sign* or feature*)) and ((follow up or future or further or additional or extra or seek*) adj5 (appointment* or consult* or help or advice)).ti,ab.                                     |
| 17  | ((worr* or concern*) adj3 (symptom* or sign* or feature*)) and patient safety).ti,ab.                                                                                                                                          |
| 18  | ((worr* or concern*) adj3 (symptom* or sign* or feature*)) and (information adj3 need*).ti,ab.                                                                                                                                 |
| 19  | 2 or 3 or 4 or 5 or 6 or 7 or 8 or 9 or 10 or 11 or 12 or 13 or 14 or 15 or 16 or 17 or 18                                                                                                                                     |
| 20  | Ambulatory Care/                                                                                                                                                                                                               |
| 21  | exp Ambulatory Care Facilities/                                                                                                                                                                                                |
| 22  | general practice/ or family practice/                                                                                                                                                                                          |
| 23  | general practitioners/ or physicians, family/ or physicians, primary care/                                                                                                                                                     |
| 24  | Primary Health Care/                                                                                                                                                                                                           |
| 25  | Office Visits/                                                                                                                                                                                                                 |
| 26  | exp Emergency Service, Hospital/                                                                                                                                                                                               |
| 27  | Emergency Medical Services/                                                                                                                                                                                                    |
| 28  | (ambulatory adj3 (care or setting? or facilit* or ward? or department? or service?)).ti,ab.                                                                                                                                    |
| 29  | ((general or family) adj2 (practi* or physician? or doctor?)).ti,ab.                                                                                                                                                           |
| 30  | (primary care or primary health care or primary healthcare).ti,ab.                                                                                                                                                             |

|    |                                                                                                                                                              |
|----|--------------------------------------------------------------------------------------------------------------------------------------------------------------|
| 31 | (community adj3 (practitioner? or nurse? or pharmac*)).ti,ab.                                                                                                |
| 32 | (emergency adj3 (care or setting? or facilit* or ward? or department? or service?)).ti,ab.                                                                   |
| 33 | (after hour? or afterhour? or "out of hour?" or ooh).ti,ab.                                                                                                  |
| 34 | (clinic? or visit?).ti,ab.                                                                                                                                   |
| 35 | ((health* or medical or walk-in or walkin) adj2 (center? or centre?)).ti,ab.                                                                                 |
| 36 | (first contact or "first point of contact").ti,ab.                                                                                                           |
| 37 | (general practi* or primary care or primary health* or family pract* or family physician?).in,jw.                                                            |
| 38 | 20 or 21 or 22 or 23 or 24 or 25 or 26 or 27 or 28 or 29 or 30 or 31 or 32 or 33 or 34 or 35 or 36 or 37                                                     |
| 39 | 19 and 38                                                                                                                                                    |
| 40 | 1 or 39                                                                                                                                                      |
| 41 | (uninsured or "no insurance" or "lack of insurance" or medicare or Medicaid or "affordable care act").ti,ab.                                                 |
| 42 | (safety net adj3 (hospital? or clinic? or program* or provider* or system? or center? or institute*)).ti,ab.                                                 |
| 43 | (US adj2 safety net).ti,ab.                                                                                                                                  |
| 44 | 41 or 42 or 43                                                                                                                                               |
| 45 | 40 not 44                                                                                                                                                    |
| 46 | ((gene* adj3 (risk or screen*)) or screening or proband).ti,ab.                                                                                              |
| 47 | 45 not 46                                                                                                                                                    |
| 48 | Terminal Care/ or Terminally Ill/ or (terminal* ill* or terminal care or "end of life care" or palliative care).ti.                                          |
| 49 | 47 not 48                                                                                                                                                    |
| 50 | limit 49 to yr="1987 -Current"                                                                                                                               |
| 51 | ("31468890" or "31439453" or "31354078" or "30376908" or "21249820" or "27441326" or "30429203" or "31027482" or "31515421" or "31468848" or "30728187").ui. |
| 52 | 50 and 51                                                                                                                                                    |
